# Supplementary figures and images for: Biogenic selenium nanoparticles alleviate intestinal epithelial barrier injury by regulating mitochondria–lysosome crosstalk
Source: Royal Society of Chemistry journal article supplement (doi:10.1039/d2fo03992c), 2023-01-01

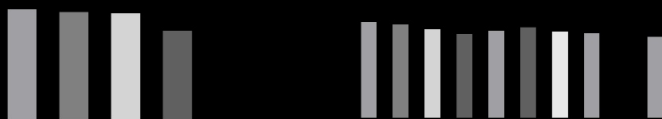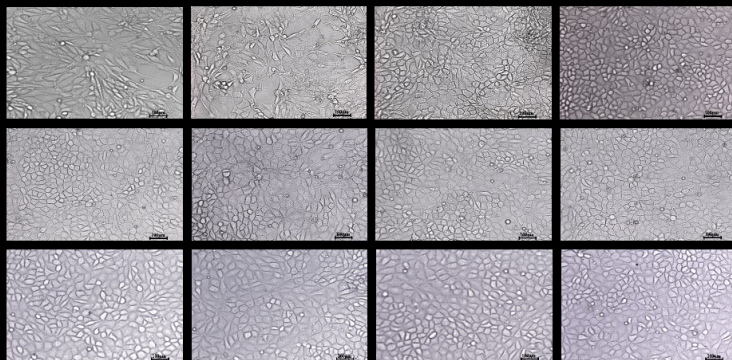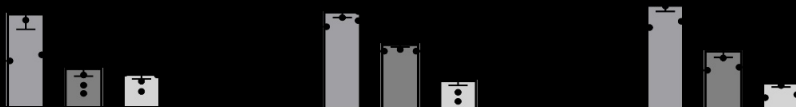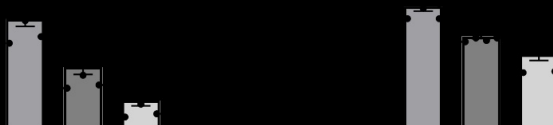

Supplement: d2fo03992c2.pdf [file d2fo03992c2.pdf]

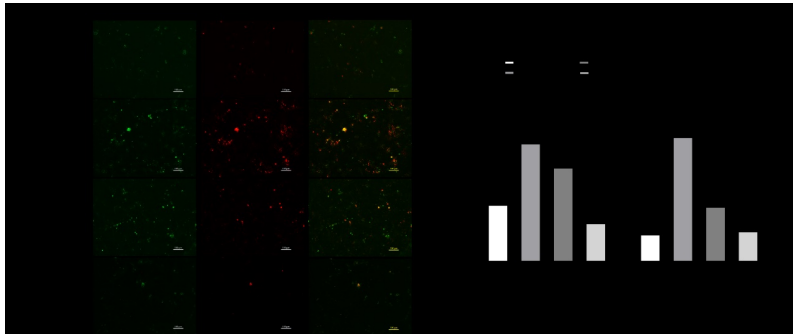

Supplement: d2fo03992c3.pdf [file d2fo03992c3.pdf]

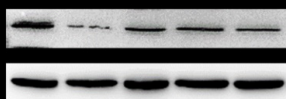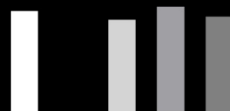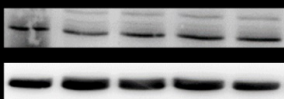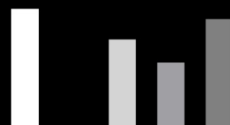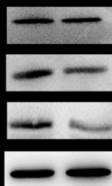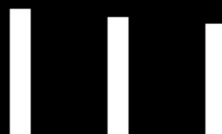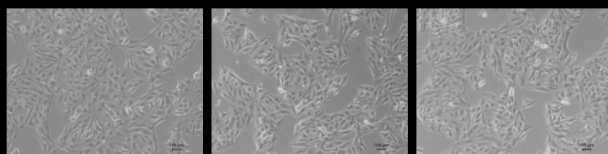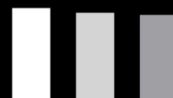

Supplement: d2fo03992c4.pdf [file d2fo03992c4.pdf]
